# Supplementary material
Source: publisher site journal article supplement (https://www.dovepress.com/article/401341)
Supplement: Supplementary file 1 [file get_supplementary_file.php]

**Supplementary table. Trends in antimicrobial resistance rates of *E.coli*, *K.pneumoniae* and *E.cloacae* from 2016 to 2021**

| **Antimicrobial agent** | **2016**  **(N-DR/DR) DRR** | | | **2017**  **(N-DR/DR) DRR** | | | **2018**  **(N-DR/DR) DRR** | | | **2019**  **(N-DR/DR) DRR** | | | **2020**  **(N-DR/DR) DRR** | | | **2021**  **(N-DR/DR) DRR** | | | **z** | | | ***P***-values | | |
| --- | --- | --- | --- | --- | --- | --- | --- | --- | --- | --- | --- | --- | --- | --- | --- | --- | --- | --- | --- | --- | --- | --- | --- | --- |
| ***E.coli*** | ***K.pneumoniae*** | ***E.cloacae*** | ***E.coli*** | ***K.pneumoniae*** | ***E.cloacae*** | ***E.coli*** | ***K.pneumoniae*** | ***E.cloacae*** | ***E.coli*** | ***K.pneumoniae*** | ***E.cloacae*** | ***E.coli*** | ***K.pneumoniae*** | ***E.cloacae*** | ***E.coli*** | ***K.pneumoniae*** | ***E.cloacae*** | ***E.coli*** | ***K.pneumoniae*** | ***E.cloacae*** | ***E.coli*** | ***K.pneumoniae*** | ***E.cloacae*** |
| **AMP** | (126/744) 85.52 | - | - | (127/710) 84.83 | - | - | (137/926) 87.11 | - | - | (94/464) 83.15 | - | - | (148/747) 83.46 | - | - | (171/840) 83.09 | - | - | 0.681 | - | - | 0.409 | - | - |
| **PIP** | (62/133) 68.21 | (76/45) 37.19 | (17/6) 26.09 | (246/593) 70.68 | (259/162) 38.48 | (56/31) 35.63 | (295/768) 72.25 | (326/226) 40.94 | (76/43) 36.13 | (176/382) 68.46 | (199/159) 44.41 | (44/30) 40.54 | (281/614) 68.60 | (304/233) 43.39 | (76/67) 46.85 | (348/663) 65.58 | (335/235) 41.23 | (88/68) 43.59 | 0.267 | 0.854 | 9.885 | 0.606 | 0.356 | 0.002** |
| **AMC** | (649/211) 24.53 | (323/127) 28.22 | - | (582/243) 29.45 | (307/106) 25.67 | - | (845/209) 19.83 | (427/122) 22.22 | - | (325/78) 19.35 | (200/64) 24.24 | - | (723/163) 18.40 | (401/137) 25.46 | - | - | - | - | 3.328 | 0.341 | - | 0.068 | 0.559 | - |
| **SAM** | (520/349) 40.16 | (292/162) 35.68 | - | (387/451) 53.82 | (265/156) 37.05 | - | (496/566) 53.30 | (335/217) 39.31 | - | (360/365) 50.34 | (284/206) 42.04 | - | (456/439) 49.05 | (315/222) 41.34 | - | (505/506) 50.05 | (332/239) 41.86 | - | 0.584 | 1.209 | - | 0.445 | 0.276 | - |
| **TZP** | (823/48) 5.51 | (388/66) 14.54 | (75/22) 22.68 | (804/34) 4.06 | (373/50) 11.82 | (76/14) 15.56 | (1,009/54) 5.08 | (485/67) 12.14 | (92/27) 22.69 | (532/26) 4.66 | (293/65) 18.16 | (61/13) 17.57 | (843/52) 5.81 | (432/108) 20.00 | (103/40) 27.97 | (976/36) 3.56 | (475/96) 16.81 | (118/40) 25.32 | 0.048 | 1.727 | 1.39 | 0.827 | 0.189 | 0.238 |
| **ATM** | (111/64) 36.57 | (73/29) 28.43 | (10/2) 16.67 | (497/311) 38.49 | (305/99) 24.50 | (23/9) 28.13 | (651/398) 37.94 | (405/135) 25.00 | (52/28) 35.00 | (431/273) 38.78 | (333/146) 30.48 | (66/26) 28.26 | (552/344) 38.39 | (362/178) 32.96 | (81/62) 43.36 | (662/349) 34.52 | (406/166) 29.02 | (105/52) 33.12 | 0.049 | 0.853 | 9.34 | 0.824 | 0.356 | 0.002** |
| **IPM** | (861/10) 1.15 | (434/21) 4.62 | (94/3) 3.09 | (826/13) 1.55 | (404/19) 4.49 | (87/3) 3.33 | (1,059/4) 0.38 | (536/16) 2.90 | (109/10) 8.40 | (719/8) 1.10 | (433/59) 11.99 | (89/6) 6.32 | (880/15) 1.68 | (453/87) 16.11 | (135/8) 5.59 | (1,000/12) 1.19 | (492/80) 13.99 | (141/17) 10.76 | 0.012 | 19.536 | 5.445 | 0.911 | 0.002** | 0.020* |
| **MEM** | (861/10) 1.15 | (435/20) 4.40 | (94/3) 3.09 | (828/10) 1.19 | (403/20) 4.73 | (87/3) 3.33 | (1059/4) 0.38 | (534/18) 3.26 | (110/9) 7.56 | (721/6) 0.83 | (432/60) 12.20 | (91/4) 4.21 | (884/12) 1.34 | (453/87) 16.11 | (135/8) 5.59 | (1,001/11) 1.09 | (491/81) 14.16 | (140/18) 11.39 | 0.017 | 14.739 | 5.258 | 0.895 | 0.000** | 0.022* |
| **CIP** | (275/596) 68.43 | (301/154) 33.85 | (67/30) 30.93 | (221/618) 73.66 | (274/149) 35.22 | (55/35) 38.89 | (260/803) 75.54 | (349/202) 36.66 | (93/26) 21.85 | (150/408) 73.12 | (208/150) 41.90 | (57/17) 22.97 | (233/663) 74.00 | (301/238) 44.16 | (96/47) 32.87 | (269/741) 73.37 | (331/238) 41.83 | (110/48) 30.38 | 0.35 | 3.108 | 0.331 | 0.554 | 0.078 | 0.565 |
| **LVX** | (301/570) 65.44 | (357/98) 21.54 | (74/23) 23.71 | (298/541) 64.48 | (341/82) 19.39 | (69/21) 23.33 | (368/695) 65.38 | (436/115) 20.87 | (100/19) 15.97 | (259/468) 64.37 | (367/124) 25.25 | (83/12) 12.63 | (307/588) 65.70 | (387/152) 28.20 | (112/31) 21.68 | (349/662) 65.48 | (415/156) 27.32 | (116/42) 26.58 | 0.016 | 2.476 | 0.07 | 0.9 | 0.116 | 0.791 |
| **AMK** | (842/29) 3.33 | (432/23) 5.05 | (87/1) 1.14 | (811/28) 3.34 | (409/14) 3.31 | (89/1) 1.11 | (1042/21) 1.98 | (540/12) 2.17 | (118/1) 0.84 | (548/10) 1.79 | (315/43) 12.01 | (73/1) 1.35 | (868/28) 3.13 | (467/73) 13.52 | (143/0) 0.00 | (984/28) 2.77 | (509/63) 11.01 | (157/1) 0.63 | 0 | 10.527 | - | 1 | 0.001** | - |
| **GEN** | (432/439) 50.40 | (342/113) 24.84 | (72/25) 25.77 | (485/354) 42.19 | (333/90) 21.28 | (71/19) 21.11 | (605/458) 43.09 | (453/99) 17.93 | (104/15) 12.61 | (336/222) 39.78 | (272/86) 24.02 | (62/13) 17.33 | (517/377) 42.17 | (397/140) 26.07 | (113/30) 20.98 | (605/406) 40.16 | (416/155) 27.15 | (119/37) 23.72 | 1.636 | 0.762 | 0.032 | 0.201 | 0.383 | 0.589 |
| **TOB** | (149/26) 14.86 | (91/9) 9.00 | (10/2) 16.67 | (682/126) 15.59 | (364/40) 9.90 | (25/7) 21.88 | (921/128) 12.20 | (507/32) 5.94 | (68/12) 15.00 | (479/56) 10.47 | (298/47) 13.62 | (63/8) 11.27 | (770/126) 14.06 | (446/94) 17.41 | (122/21) 14.69 | (877/133) 13.17 | (469/102) 17.86 | (136/22) 13.92 | 0.4 | 7.223 | 1.727 | 0.527 | 0.007** | 0.189 |
| **CZO** | (269/600) 69.04 | (251/204) 44.84 | - | (249/548) 68.76 | (205/162) 44.14 | - | (332/694) 67.64 | (262/256) 49.42 | - | (101/265) 72.40 | (108/139) 56.28 | - | (293/488) 62.48 | (282/177) 38.56 | - | (353/522) 59.66 | (301/181) 37.55 | - | 2.467 | 1.065 | - | 0.116 | 0.302 | - |
| **CXM** | (336/535) 61.42 | (274/181) 39.78 | (26/71) 73.20 | (331/508) 60.55 | (270/153) 36.17 | (29/58) 66.67 | (437/626) 58.89 | (336/215) 39.02 | (43/75) 63.56 | (187/239) 56.10 | (149/122) 45.02 | (26/26) 50.00 | (374/521) 58.21 | (318/218) 40.67 | (61/78) 56.12 | (441/570) 56.38 | (341/230) 40.28 | (65/91) 58.33 | 0.804 | 0.262 | 8.951 | 0.37 | 0.609 | 0.003** |
| **CAZ** | (645/226) 25.95 | (361/94) 20.66 | (67/30) 30.93 | (620/219) 26.10 | (340/83) 19.62 | (64/25) 28.09 | (781/281) 26.46 | (452/99) 17.97 | (82/37) 31.09 | (536/191) 26.27 | (369/123) 25.00 | (67/28) 29.47 | (653/243) 27.12 | (396/144) 26.67 | (86/57) 39.86 | (777/234) 23.15 | (437/135) 23.60 | (97/61) 38.61 | 0.108 | 1.512 | 3.532 | 0.743 | 0.219 | 0.06 |
| **CRO** | (354/517) 59.36 | (289/166) 36.48 | (58/39) 40.21 | (341/498) 59.36 | (277/146) 34.52 | (59/31) 34.44 | (444/619) 58.23 | (352/200) 36.23 | (72/47) 39.50 | (189/238) 55.74 | (156/115) 42.44 | (28/23) 45.10 | (382/514) 57.37 | (322/215) 40.04 | (77/66) 46.15 | (463/549) 54.25 | (355/216) 37.83 | (86/70) 44.87 | 0.634 | 0.583 | 2.589 | 0.426 | 0.445 | 0.108 |
| **CTX** | (316/474) 60.00 | (252/155) 38.08 | (50/39) 43.82 | (315/475) 60.13 | (248/142) 36.41 | (45/36) 44.44 | (431/624) 59.15 | (334/210) 38.60 | (62/53) 46.09 | (184/238) 56.40 | (151/119) 44.07 | (27/24) 47.06 | - | - | - | - | - | - | 0.348 | 0.992 | 0.244 | 0.555 | 0.337 | 0.622 |
| **FEP** | (572/299) 34.33 | (353/102) 22.42 | (79/18) 18.56 | (675/164) 19.55 | (355/68) 16.08 | (72/18) 20.00 | (866/197) 18.53 | (461/90) 16.33 | (98/21) 17.65 | (591/129) 17.92 | (384/106) 21.63 | (79/15) 15.96 | (734/162) 18.08 | (412/128) 23.70 | (107/36) 25.17 | (866/145) 14.34 | (463/109) 19.06 | (120/38) 24.05 | 10.019 | 0.202 | 1.271 | 0.002** | 0.653 | 0.26 |
| **FOX** | (763/107) 12.30 | (367/86) 18.98 | - | (713/98) 12.08 | (346/56) 13.93 | - | (812/99) 10.87 | (410/59) 12.58 | - | (105/11) 9.48 | (68/18) 20.93 | - | - | - | - | - | - | - | 0.509 | 0.089 | - | 0.475 | 0.765 | - |
| **NIT** | (87/5) 5.43 | (36/9) 20.00 | (3/1) 25.00 | (359/14) 3.75 | (73/22) 23.16 | (12/1) 7.69 | (601/24) 3.84 | (154/72) 31.86 | (32/11) 25.58 | (199/5) 2.45 | (36/19) 34.55 | (8/3) 27.27 | (386/16) 3.98 | (58/32) 64.44 | (23/5) 17.86 | (456/18) 3.80 | (61/46) 57.01 | (22/8) 26.67 | 0.19 | 58.259 | 1.405 | 0.663 | 0.000** | 0.236 |
| **SXT** | (310/549) 63.91 | (289/160) 35.63 | (65/31) 32.29 | (362/477) 56.85 | (306/117) 27.66 | (68/22) 24.44 | (467/595) 56.03 | (372/180) 32.61 | (93/26) 21.85 | (256/301) 54.04 | (241/117) 32.68 | (59/15) 20.27 | (373/523) 58.37 | (378/162) 30.00 | (102/41) 28.67 | (443/567) 56.14 | (404/168) 29.37 | (111/47) 29.75 | 0.888 | 0.556 | 0.007 | 0.346 | 0.456 | 0.935 |

“-”represents the bacteria was intrinsic resistance to antimicrobial.

N-DR denotes non-resistant strains, DR denotes resistant strains, and DRR denotes antimicrobial resistance rate (linear by linear association,**P* < 0.05, ***P* < 0.01).

AMP = ampicillin. PIP = piperacillin. AMC = amoxicillin-clavulanic acid. SAM = ampicillin-sulbactam. TZP = piperacillin-tazobactam. ATM = aztreonam. IPM = imipenem. MEM = meropenem. CIP = ciprofloxacin. LVX = levofloxacin. AMK = amikacin. GEN = gentamicin. TOB = tobramycin. CZO = cefazolin. CXM = cefuroxime. CAZ = ceftazidime. CRO = ceftriaxone. CTX = cefotaxime. FEP = cefepime. FOX = cefoxitin. NIT = nitrofurantoin. SXT = sulfamethoxazole-trimethoprim.
